# Supplementary material for: Natural iron ore as a novel substrate for the biosynthesis of bioactive-stable ZnO@CuO@iron ore NCs: a magnetically recyclable and reusable superior nanocatalyst for the degradation of organic dyes, reduction of Cr(vi) and adsorption of crude oil aromatic compounds, including PAHs
Source: Royal Society of Chemistry journal article supplement (doi:10.1039/c8ra06028b), 2018-01-01
Supplement: c8ra06028b1.pdf [file c8ra06028b1.pdf]

## Supporting Information

# Natural Iron Ore as a Novel Substrate to Biosynthesis of Bioactive Stable ZnO@CuO@Iron ore NCs: A magnetically Recyclable and Reusable Superior Nanocatalyst for Degradation of Organic Dyes, Reduction of Cr(VI) and Adsorption of Crude Oil Aromatic Compounds including PAHs

S. Mohammad Sajadi<sup>1,2\*</sup>, Kamal Kolo<sup>1</sup>, Mohammad Pirouei<sup>1,2</sup>, Sarbast A. Mahmud<sup>3,4</sup>, Jagar. A. Ali<sup>1</sup>, Samir M. Hamad<sup>1,5</sup>

<sup>1</sup>Scientific Research Center, Soran University, PO Box 624, Soran, KRG, Iraq. E-mail: smohammad.sajadi@gmail.com; +9647503714550; Tel: +9647503714551

<sup>2</sup>Department of petroleum geosciences, Faculty of Sciences, Soran University, PO Box 624, Soran, KRG, Iraq

<sup>3</sup> Department of Biology, Faculty of Sciences, Soran University, PO Box 624, Soran, KRG, Iraq

<sup>4</sup>Department of Pharmacy, Rwandz private technical institute, Rawanduz, Soran, KRG, Iraq

<sup>5</sup>Research Center, Cihan University-Erbil, Iraq

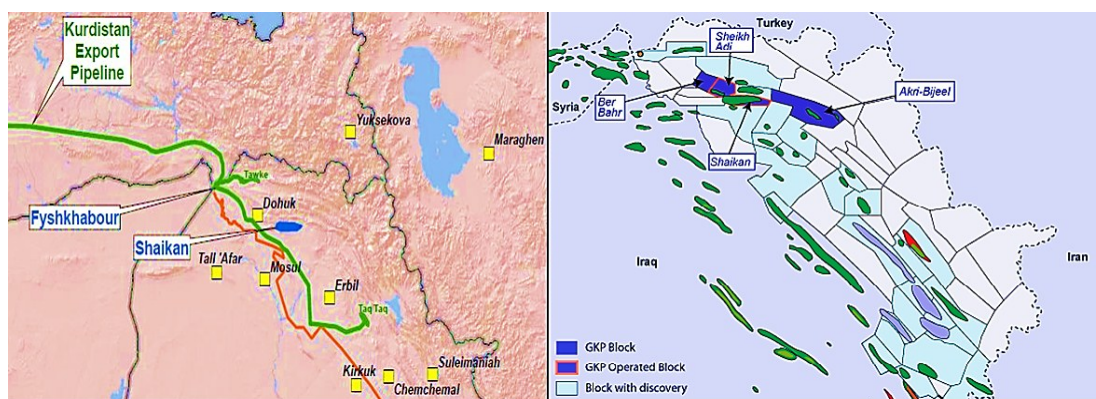

Figure1. Shaikhan oil field position in Iraqi Kurdistan region

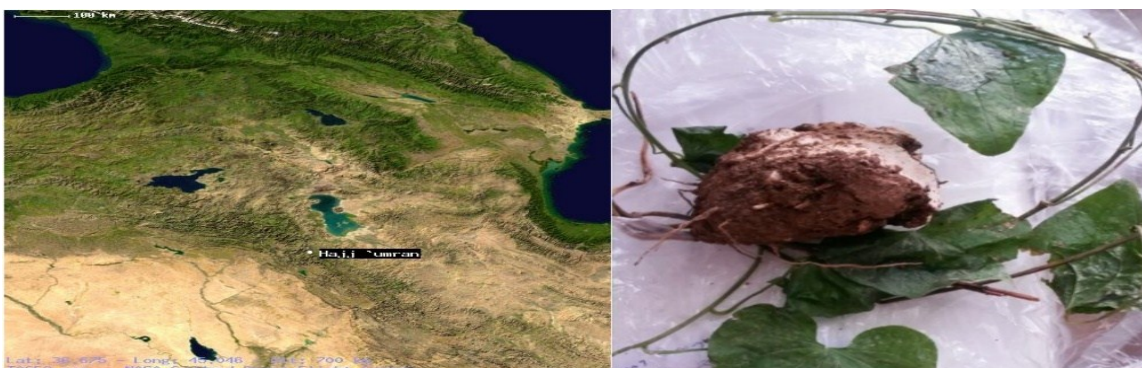

**Figure 2.** Geographical image of Haji Umran by Google Earth and *Bryonia dioica* root image

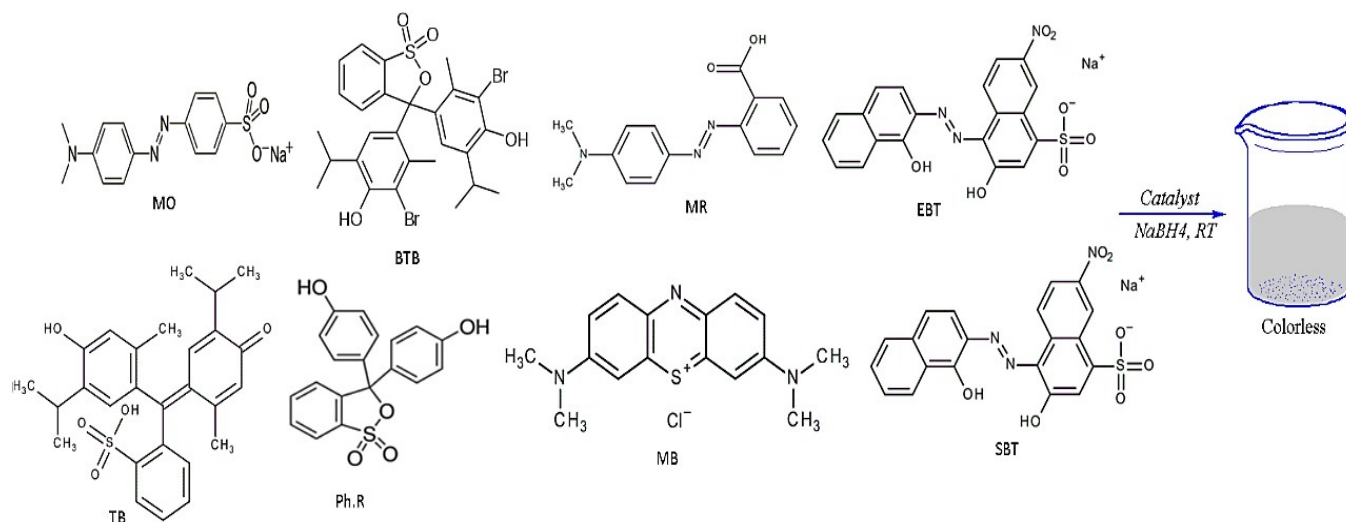

**Figure 3.** Catalytic reduction of MO, MB, TB, BTB, Ph.R, MR, SBT and EBT

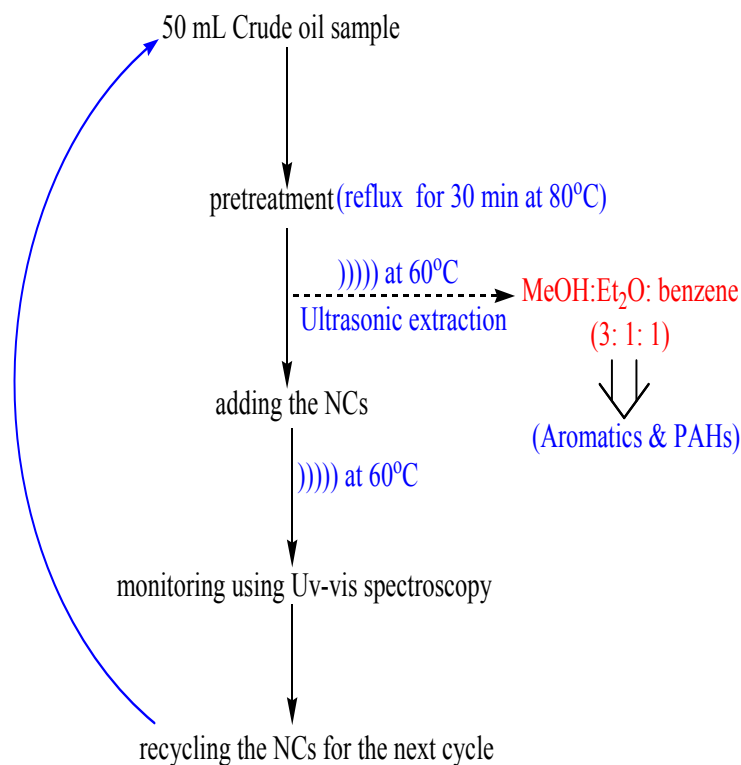

**Scheme 1.** Catalytic adsorption of the aromatic compounds of Shaikhan crude oil sample by ZnO@CuO@Iron ore NCs

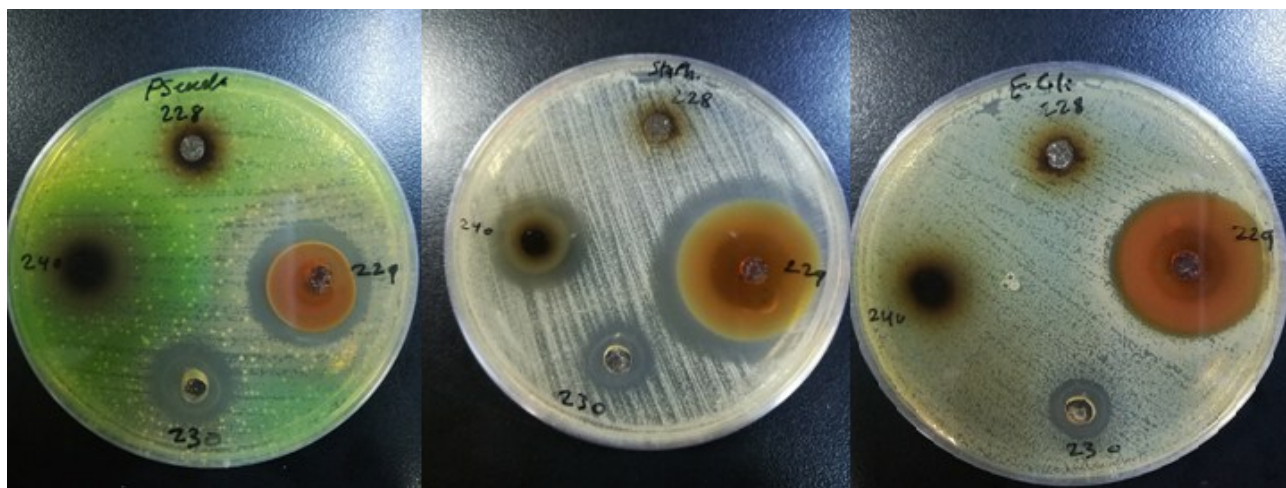

**Figure 4.** antibacterial activity of 2% NCs (229), 1% NCs (240), Plant extract (230) and Chloramphenicol (228) as positive control

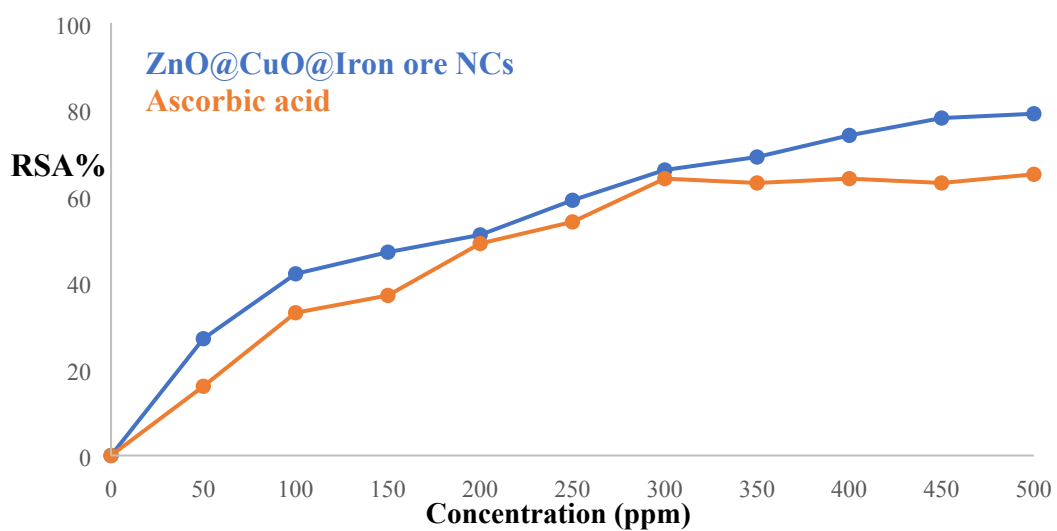

**Figure 5.** The radical scavenging ability of the green synthesized nanocomposite in comparison with ascorbic acid.
